# Supplementary material for: Cereal processing at Early Neolithic Göbekli Tepe, southeastern Turkey
Source: PLoS One. 2019 May 1;14(5):e0215214. doi: 10.1371/journal.pone.0215214 (PMC6493732; doi:10.1371/journal.pone.0215214)
Supplement: S1 Table — (XLSX) [file pone.0215214.s001.xlsx]

## Sheet: Tabelle1
S1 Table: Total amount of analyzed grinding stones (current database)
Handstones
Main excavation area and a selection from the northwestern area	3351
Rectangular rooms in main excavation area (finds in context)	472
Fillings of the circular buildings and sediment above the buildings in main excavation area	1400
Grinding bowls and slabs
Main excavation area and a selection from the northwestern area	1945
Rectangular rooms in main excavation area (finds in context)	310
Fillings of the circular buildings and sediment above the buildings in main excavation area	552
Pestles
Main excavation area and a selection from the northwestern area	1972
Rectangular rooms in main excavation area (finds in context)	289
Fillings of the circular buildings and sediment above the buildings in main excavation area	702
