# Supplementary material for: Cereal processing at Early Neolithic Göbekli Tepe, southeastern Turkey
Source: PLoS One. 2019 May 1;14(5):e0215214. doi: 10.1371/journal.pone.0215214 (PMC6493732; doi:10.1371/journal.pone.0215214)
Supplement: S2 Table — (XLSX) [file pone.0215214.s002.xlsx]

## Sheet: Tabelle1
S2 Table: Distribution of grinding stones in the fillings in main excavation area (current database)
Zones of the room fillings
Zone 1: plough horizon
Zone 2: upper and middle parts of the room filling
Zone 3: lower part of the filling up to 10 cm above the floor
Zone 4: on the floor
Zone 5: niche on the floor
Zone 6: wall
Zone 7: area outside of the rooms
Handstones: disposition in the room fillings
Zone 1	176
Zone 2	105
Zone 3	41
Zone 4 and 5	8
Zone 6	6
Zone 7	136
	472
Grinding bowls and slabs: disposition in the room fillings
Zone 1	103
Zone 2	98
Zone 3	47
Zone 4 and 5	23
Zone 6	16
Zone 7	23
	310
Pestles: disposition in the room fillings
Zone 1	152
Zone 2	49
Zone 3	22
Zone 4 and 5	6
Zone 6	5
Zone 7	55
	289
Handstones: disposition in the filling of Building D
Layers 14-19	119
Layers 9-13	328
Layers 1-8	190
	637
