# Supplementary material for: Cereal processing at Early Neolithic Göbekli Tepe, southeastern Turkey
Source: PLoS One. 2019 May 1;14(5):e0215214. doi: 10.1371/journal.pone.0215214 (PMC6493732; doi:10.1371/journal.pone.0215214)
Supplement: S3 Table — (XLSX) [file pone.0215214.s003.xlsx]

## Sheet: Tabelle1
S3 Table: Distribution of grinding stones in rooms in main excavation area
*area
**selection of rooms
Grinding stones in rooms	Handstones	Grindings bowls/slabs	Pestles
L10-51*
Room 25**	5	1	6
Room 27**	0	3	2
Room 28**	2	1	6
Room 24**	0	1	0
Room 29**	0	0	2
L10-61*
Room 36**	0	1	0
L10-71*
Room 38**	1	1	1
L9-80*
Room 17**	0	2	1
Room 18**	3	0	1
Room 19**	1	1	2
Room 20**	1	2	2
Room 16**	38	12	13
Room 96**	0	0	1
L9-79*
Room 12**	6	3	6
Room 13**	9	0	1
Area in front of complex 16	69	16	26
L9-70*
Room 50**	0	0	0
Room 47**	0	1	0
L9-60*
Room 44**	0	1	0
Room 43**	0	3	0
Room 45**	0	2	0
L9-59*
Room 55**	1	0	0
Raum 59 and 60**	0	3	0
L9-56*
Room 9**	16	24	6
Room 7**	4	7	0
Room 8**	19	12	6
L9-55*
Room 2**	0	1	0
Room 3**	0	1	1
Room 5**	1	0	0
Room 4**	0	0	1
Room 1**	1	1	0
L9-97*
Locus 8**	1	0	0
Locus 9**	8	0	0
Locus 33**	5	0	0
Locus 2.4**	11	0	9
L9-96*
Room 84**	0	2	0
Room 81**	2	3	1
Room 80**	2	0	2
Room 83**	0	0	1
Area on the terrace	26	4	28
L9-37*
Room 115**	2	8	0
L9-27*
Room 120**	0	8	0
L9-07*
Room 134**	4	9	0
K9-97*
Room 147**	2	3	0
