# Supplementary material for: Cereal processing at Early Neolithic Göbekli Tepe, southeastern Turkey
Source: PLoS One. 2019 May 1;14(5):e0215214. doi: 10.1371/journal.pone.0215214 (PMC6493732; doi:10.1371/journal.pone.0215214)
Supplement: S4 Table — (XLSX) [file pone.0215214.s004.xlsx]

## Sheet: S4
S4 Table: Description of samples, phytolith amounts, relative abundances of phytoliths, anatomical origin of grass phytoliths and amount of multicell phytoliths obtained from all sediment samples.
Sample ID, description of sample location and phytolith amounts			Relative abundances of phytoliths					Anatomical origin of grass phytoliths
Sample ID	Number of phyt. per 1 g of sediment	Layer/ areal/ description	Grass phyt. (%)	Dicotyledonous leaves (%)	Dicotyledonous wood/bark (%)	Other phyt. (%)	Weathered morphotypes (%)	Leaves and stems (%)	Short Cells (%)	Inflorescence phyt. (%)	Multicell phyt. (%)
			phyt. (%)	Leaves	phyt. (%)	phyt. (%)	phyt. (%)
				phyt. (%)				Leaves and stems	Short Cells	Inflorescence phyt. (%)	Multicell phyt. (%)
M11-263	970,000	S3; L09-69; fill	88.97	2.36	5.45	0.46	2.76	28.6	49.5	21.9	0.9
M11-264	530,000	S2; L09-69; floor	70.93	6.54	9.24	11.25	2.04	29.7	17.0	53.3	2.5
M11-266	3,000,000	S3; L09-69; fill	78.83	6.12	8.41	5.34	1.30	28.3	8.8	62.9	14.8
M11-267	500,000	S2; L09-69; floor	79.69	3.27	6.47	6.98	3.59	28.7	15.4	55.9	15.2
M11-269	2,200,000	S3; L09-69; bedrock	85.76	2.54	7.04	3.34	1.32	27.3	43.1	29.6	6.5
M11-270	830,000	S2; L09-69; floor	81.21	5.72	6.46	4.80	1.81	28.8	18.3	52.9	7.6
M11-274	1,400,000	S2; L09-69; floor	80.34	5.63	4.84	7.66	1.53	20.8	22.7	56.5	11.5
M11-276	620,000	S3; L09-69; fill	79.79	5.55	9.12	4.50	1.04	28.3	29.3	42.4	11.1
M13-133	990,000	Stone vessel	86.58	1.17	10.51	0.50	1.24	26.5	24.9	48.6	5.2
