# Supplementary material for: Cereal processing at Early Neolithic Göbekli Tepe, southeastern Turkey
Source: PLoS One. 2019 May 1;14(5):e0215214. doi: 10.1371/journal.pone.0215214 (PMC6493732; doi:10.1371/journal.pone.0215214)
Supplement: S5 Table — (XLSX) [file pone.0215214.s005.xlsx]

## Sheet: Tabelle1
S5 Table: Morphometric results of the parameter "Largest width" of elongate dendritic phytoliths of selected wheat and barley species from Ball et al. (1999).
Species	Mean	SD	Min	Max	N
T. monococcum	16.4	3.1	9	25.7	50
T. dicoccon	20.6	5.4	6.7	51.5	50
T. dicoccoides	21.1	3.0	10.7	23.1	50
T. aestivum	23.7	5.6	9.1	20.3	50
H. spontaneum	11.4	3.7	5.0	21.4	50
H. vulgare	11.5	3.8	3.1	28.1	50
