# Supplementary material for: Cereal processing at Early Neolithic Göbekli Tepe, southeastern Turkey
Source: PLoS One. 2019 May 1;14(5):e0215214. doi: 10.1371/journal.pone.0215214 (PMC6493732; doi:10.1371/journal.pone.0215214)
Supplement: S6 Table — (XLSX) [file pone.0215214.s006.xlsx]

## Sheet: Tabelle1
S6 Table: Morphometric results of the parameter "Largest width" of elongate dendritic phytoliths of selected samples from Göbekli Tepe.
Sample ID	Mean	SD	Min	Max	N
M11-266	13.2	3.9	6.6	21.9	70
M11-269	15.1	4.8	6.0	27.4	70
M11-270	15.4	6.2	6.9	38.8	70
M13-133	12.1	4.3	6.4	30.0	70
