# Supplementary material for: Cereal processing at Early Neolithic Göbekli Tepe, southeastern Turkey
Source: PLoS One. 2019 May 1;14(5):e0215214. doi: 10.1371/journal.pone.0215214 (PMC6493732; doi:10.1371/journal.pone.0215214)
Supplement: S7 Table — (XLSX) [file pone.0215214.s007.xlsx]

## Sheet: Tabelle1
S7 Table: Comparison of morphometric results of the parameter "Largest width" of elongate dendritic phytoliths between species measured by Ball et al. (1999) and samples from Göbekli Tepe by the Welch t test.
(Explanation of the numerical meanings: 1 = by conventional criteria, this difference is considered to be extremely statistically significant; 2 = by conventional criteria, this difference is considered to be not quite statistically significant; 3 = by conventional criteria, this difference is considered to be not statistically significant)
Sample ID	T. monococcum	T. dicoccon	T. dicoccoides	T. aestivum	H. spontaneum	H. vulgare
M11-266	1	1	1	1	1	1
M11-269	2	1	1	1	1	1
M11-270	3	1	1	1	1	1
M13-133	1	1	1	1	3	3
