# Supplementary material for: Cereal processing at Early Neolithic Göbekli Tepe, southeastern Turkey
Source: PLoS One. 2019 May 1;14(5):e0215214. doi: 10.1371/journal.pone.0215214 (PMC6493732; doi:10.1371/journal.pone.0215214)
Supplement: S8 Table — (XLSX) [file pone.0215214.s008.xlsx]

## Sheet: Tabelle1
S8 Table: Comparison of morphometric results of the parameter "Largest width" of elongate dendritic phytoliths between Göbekli Tepe samples by the Welch t test.
(Explanation of the numerical meanings: 1 = by conventional criteria, this difference is considered to be extremely statistically significant; 2 = by conventional criteria, this difference is considered to be not quite statistically significant; 3 = by conventional criteria, this difference is considered to be not statistically significant)
Sample ID	M11-266	M11-269	M11-270	M13-133
M11-266	-	1	1	3
M11-269	1	-	3	1
M11-270	1	3	-	1
M11-133	3	1	1	-
