# Supplementary material for: Cereal processing at Early Neolithic Göbekli Tepe, southeastern Turkey
Source: PLoS One. 2019 May 1;14(5):e0215214. doi: 10.1371/journal.pone.0215214 (PMC6493732; doi:10.1371/journal.pone.0215214)
Supplement: S9 Table — (XLSX) [file pone.0215214.s009.xlsx]

## Sheet: Tabelle1
S9 Table: Description of samples, sampling strategy and phytolith amounts obtained from selected grinding stones.
* The dry brushing of this grinding stone has not provided sufficient sample material for analysis.
Stone Nr.	Sample Nr.	Sample ID	Archaeological context	Grinding stone type; state of preservation	Sampled stone side	Sampling strategy	Phytoliths per 1 g of sediment
GS-1	1	FD 04	K09-87; Loc 29.1; Sys 2	Handstone (type 1); complete	Grinding side	Wet brushing	391,000
	2	FD 05	K09-87; Loc 29.1; Sys 2	Handstone (type 1); complete	Back side	Wet brushing	166,000
	3	MZR 03	K09-87; Loc 29.1; Sys 2	Handstone (type 1); complete	Grinding side and back side	Dry brushing	82,000
GS-2	4	FD 06	L09-17; Loc 12.5; Sys 4	Handstone (type 1); complete	Grinding side	Wet brushing*	71,000
GS-3	5	FD 11	L09-17; Loc 12.5; Sys 4	Grinding slab; fragment	Grinding side	Wet brushing	92,000
	6	MZR 08	L09-17; Loc 12.5; Sys 4	Grinding slab; fragment	Grinding side	Dry brushing	23,000
	7	FD 12	L09-17; Loc 12.5; Sys 4	Grinding slab; fragment	Breack side	Wet brushing	38,000
	8	MZR 09	L09-17; Loc 12.5; Sys 4	Grinding slab; fragment	Breack side	Dry brushing	46,000
	9	FD 13	L09-17; Loc 12.5; Sys 4	Grinding slab; fragment	Back side	Wet brushing	53,000
	10	MZR 10	L09-17; Loc 12.5; Sys 4	Grinding slab; fragment	Back side	Dry brushing	16,000
GS-4	11	FD 17	L09-07; Loc 5.5; Sys 4	Grinding bowl; fragment	Grinding side	Wet brushing	148,000
	12	MZR 14	L09-07; Loc 5.5; Sys 4	Grinding bowl; fragment	Grinding side	Dry brushing	13,000
	13	FD 18	L09-07; Loc 5.5; Sys 4	Grinding bowl; fragment	Breack side	Wet brushing	53,000
	14	FD 19	L09-07; Loc 5.5; Sys 4	Grinding bowl; fragment	Breack side	Wet brushing	28,000
	15	MZR 15	L09-07; Loc 5.5; Sys 4	Grinding bowl; fragment	Breack side	Dry brushing	15,000
