# Supplementary material for: Cereal processing at Early Neolithic Göbekli Tepe, southeastern Turkey
Source: PLoS One. 2019 May 1;14(5):e0215214. doi: 10.1371/journal.pone.0215214 (PMC6493732; doi:10.1371/journal.pone.0215214)
Supplement: S10 Table — (XLSX) [file pone.0215214.s010.xlsx]

## Sheet: S10
S10 Table: List of phytolith morphotypes identified and their frequencies (counts) in soil samples from the L9-69 sequence and a stone vessel, giving the stratigraphic location and sample information.
Phytolith morphotype	Sample ID	M11-263	M11-264	M11-266	M11-267	M11-269	M11-270	M11-274	M11-276	M12-133
	Sample Location	S3; L09-69; fill	S2; L09-69; floor	S3; L09-69; fill	S2; L09-69; floor	S3; L09-69; bedrock	S2; L09-69; floor	S2; L09-69; floor	S3; L09-69; fill	Stone vessel
Bulliform		0	2	3	2	3	1	0	0	4
Cillindroid psilate		57	38	59	23	103	50	26	24	0
Cillindroid scabrate		53	13	14	16	92	18	8	7	22
Elongate dendritic		29	53	42	27	50	48	29	13	85
Elongate echinate		92	149	136	75	196	143	93	46	58
Elongate polylobate		1	5	0	3	6	6	0	0	1
Elongate wavy		0	9	23	24	5	28	18	6	6
Elongate verrucate		1	0	0	0	3	0	0	0	0
Hair cell		0	7	4	1	0	4	5	5	9
Hair cell (prickle)		1	0	0	5	10	0	0	0	0
Hair unciform		0	6	2	0	0	0	3	3	0
Irregular psilate		2	0	0	0	14	0	0	0	0
Irregular scabrate		1	0	0	0	5	0	0	0	0
Oblong scabrate		0	0	5	0	0	0	0	1	0
Oblong psilate		0	0	4	0	1	0	4	3	0
Ovate psilate		0	15	5	4	0	2	0	0	0
Ovate scabrate		0	15	0	11	0	4	8	0	2
Papillae cell		1	0	0	0	0	0	27	0	0
Parallelpiped blocky		11	17	10	8	27	13	7	5	10
Parallelepiped elongate psilate		6	0	0	0	9	0	0	0	0
Parallelepiped elongate scabrate		1	0	0	0	1	0	0	0	0
Parallelpiped thin psilate		69	80	58	61	75	81	49	38	64
Parallelpiped thin scabrate		6	10	20	11	17	12	8	11	24
Rectangular		0	0	3	0	0	2	6	0	0
Reniform		0	1	1	0	0	0	0	0	0
Short cell rondel		260	61	35	47	400	79	78	60	77
Short cell tall rondel		10	3	0	4	25	5	4	2	6
Short cell trapeziform		8	4	1	2	17	2	1	3	4
Short cell cross		0	1	0	1	0	0	1	0	0
Short cell saddle		0	9	6	10	0	4	3	4	0
Short cell polylobate		4	1	0	0	0	0	0	0	0
Short cell bilobate		5	1	1	0	1	1	0	1	0
Spheroid psilate		0	22	1	1	2	1	3	0	0
Spheroid echinate		0	28	5	7	5	17	11	5	0
Spheroid granulate		8	1	7	4	20	6	1	5	6
Stellate		1	0	1	0	4	0	0	2	0
Silica skeleton elongate echinate		2	2	13	11	19	14	12	3	3
Silica skeleton elongate dendritic		0	1	0	0	0	0	0	1	1
Silica skeleton elongate wavy		3	1	51	54	25	12	28	25	13
Silica skeleton elongate psilate		1	0	0	0	18	0	0	0	0
Silica skeleton elongate verrucate		0	0	0	0	0	0	0	0	1
Silica skeleton rectangular		3	18	14	6	3	20	13	3	1
Silica skeleton ovate		0	0	3	0	0	0	0	0	0
Silica skeleton polyhedral		0	0	0	0	0	0	0	0	2
Silica skeleton jig saw puzzle		0	0	1	0	1	0	3	0	0
Silica skeleton not identifiable		1	0	0	0	13	0	0	0	0
Tracheary elements		2	20	11	27	22	20	5	11	0
Weathered morphotype		18	12	7	16	18	11	7	3	5
Total number of counted morphotypes per sample		657	605	546	461	1210	604	461	290	404
