# Supplementary material for: Cereal processing at Early Neolithic Göbekli Tepe, southeastern Turkey
Source: PLoS One. 2019 May 1;14(5):e0215214. doi: 10.1371/journal.pone.0215214 (PMC6493732; doi:10.1371/journal.pone.0215214)
Supplement: S11 Table — (XLSX) [file pone.0215214.s011.xlsx]

## Sheet: S11
S11 Table: List of phytolith morphotypes identified and their frequencies (counts) in all grinding stone samples, giving sample information and sampling strategy.
Phytolith morphotype	Sample ID	FD 04	FD 05	MZR3	FD 06	FD 11	MZR 08	FD 12	MZR 09	FD 13	MZR 10	FD 17	MZR 14	FD 18	FD 19	MZR 15
	Stone Nr.	GS-1	GS-1	GS-1	GS-2	GS-3	GS-3	GS-3	GS-3	GS-3	GS-3	GS-4	GS-4	GS-4	GS-4	GS-4
	Sampled stone side	Grinding side	Back side	Grinding side and back side	Grinding side	Grinding side	Grinding side	Breack side	Breack side	Back side	Back side	Grinding side	Grinding side	Breack side	Breack side	Breack side
	Sampling strategy	Wet brushing	Wet brushing	Dry brushing	Wet brushing	Wet brushing	Dry brushing	Wet brushing	Dry brushing	Wet brushing	Dry brushing	Wet brushing	Dry brushing	Wet brushing	Wet brushing	Dry brushing
Bulliform		0	0	0	0	2	0	0	0	0	0	0	0	0	0	1
Cillindroid psilate		18	16	0	4	5	4	0	3	5	0	6	2	4	0	0
Hair cell (prickle)		2	2	0	0	0	0	0	0	0	0	0	0	0	0	0
Elongate dendritic		0	0	0	0	1	0	0	0	2	0	3	0	0	0	0
Elongate echinate		14	6	0	4	8	4	4	3	7	2	2	2	8	1	1
Elongate polylobate		0	0	4	0	0	0	0	0	0	0	0	0	0	0	0
Parallelpiped blocky psilate		2	0	0	0	0	0	2	0	1	0	1	0	0	0	0
Parallelepiped elongate scabrate		0	0	0	0	2	0	0	0	0	0	0	0	0	0	1
Parallelepiped elongate facetate		0	0	0	0	4	0	0	0	0	0	0	0	0	0	0
Parallelpiped thin psilate		34	20	8	30	27	0	9	3	6	0	45	6	5	4	3
Parallelpiped thin scabrate		0	0	0	1	0	0	0	0	0	0	0	0	0	0	0
Short cell rondel		60	28	0	10	7	4	3	6	7	6	9	2	6	7	1
Short cell bilobate		0	0	0	0	0	0	0	0	1	0	0	0	0	0	0
Silica Skeleton elongate psilate		0	0	0	0	0	0	0	0	1	0	0	0	0	0	0
Weathered morphotyp		10	12	12	7	5	4	3	3	5	4	4	4	3	4	2
Total number of counted morphotypes per sample		140	84	24	56	61	16	21	18	35	12	70	16	26	16	9
