# Supplementary material for: Cereal processing at Early Neolithic Göbekli Tepe, southeastern Turkey
Source: PLoS One. 2019 May 1;14(5):e0215214. doi: 10.1371/journal.pone.0215214 (PMC6493732; doi:10.1371/journal.pone.0215214)
Supplement: S12 Table — (XLSX) [file pone.0215214.s012.xlsx]

## Sheet: S12 Table
S12 Table: Numbers and repository information
All necessary permits were obtained for the described study, which complied with all relevant regulations.
Finds are stored in the excavation house deposit belonging to Şanlıurfa Müzesi, Turkey, Authorisation Number: MK016301 (2018). Finds can be studied following an application to Şanlıurfa Müzesi, stating the find numbers in this document.
Find numbers
00_000006
00_000019
00_000028
00_000029
00_000031
00_000034
01_000004
01_000013
01_000044
01_000048
01_000055
01_000070
01_000115
01_000121
01_000185
01_000207
01_000209
01_000210
01_000212
01_000221
01_000226
01_000228
01_000229
01_000232
01_000233
01_000235
01_000260
01_000261
01_000263
01_000270
01_000274
01_000284
01_000288
01_000293
01_000297
01_000304
01_000307
01_000308
01_000328
01_000330
01_000341
01_000343
01_000344
01_000349
01_000354
01_000367
01_000379
01_000385
01_000391
01_000396
01_000408
01_000416
01_000421
01_000423
01_000425
01_000427
01_000446
01_000454
01_000458
01_000462
01_000467
01_000471
01_002001
01_002002
01_002010
01_002017
01_002025
01_002026
01_002027
01_002032
01_002033
01_002041
01_002042
01_002046
01_002051
01_002071
01_002074
01_002093
01_002096
01_002101
01_002107
01_002112
01_002113
01_002123
01_002133
01_002134
01_002135
01_002136
01_002139
01_002140
01_002142
01_002143
01_002147
01_002163
01_002164
01_002165
01_002168
01_002172
01_002191
01_002195
01_002196
01_002197
01_002199
01_002212
01_002215
01_002217
01_002223
01_002231
01_002246
01_002266
01_002300
01_002305
01_002313
01_002320
01_002331
01_002334
01_002341
01_002358
01_002416
01_002419
01_002435
01_002504
01_002532
01_002545
01_002560
01_002571
01_002586
01_002628
01_002630
01_002656
01_002657
01_002665
01_002679
01_002682
01_002706
01_002707
01_002709
01_002725
01_002743
01_002746
01_002747
01_002758
01_002764
01_002767
01_002780
01_002800
01_002915
01_002921
01_002923
01_002926
01_002952
01_002958
01_002961
01_004108
01_004119
01_004129
01_004145
01_004149
01_004170
01_004196
01_004197
01_004199
01_004206
01_004207
01_004211
01_004480
01_004483
01_004485
01_004486
01_004496
01_004539
01_004563
01_004572
01_004573
01_004581
01_004585
01_004598
01_004604
01_004610
01_004618
01_004619
01_004635
01_004637
01_004638
01_004641
01_004642
01_004655
01_004676
01_004711
01_004722
01_004732
01_004743
01_004758
01_004777
01_004833
01_004844
01_004869
01_004871
01_004881
01_004885
01_004891
01_004899
01_004941
01_004944
01_009227a
01_009230a
01_009234a
01_009246a
01_009252a
01_009273a
01_009274a
01_009296a
01_009601a
01_009610a
01_009616
01_009617a
01_009622a
01_009629a
01_009632a
01_009637a
01_009642a
01_009650a
01_009662a
01_009676a
01_009678a
01_009679a
01_009682a
01_009695a
01_010168a
01_010180a
01_010181a
01_010185a
01_010210
01_010211
01_10202/1295
02_000013
02_000015
02_000055
02_000067
02_000137
02_000138
02_000143
02_000243
02_000260
02_000261
02_000262
02_000263
02_000311
02_000320
02_000330
02_000416
02_000417
02_000418
02_000431
02_000481
02_000504
02_000545
02_000918
02_001029
02_001236a
02_001302
02_001778
02_001793
02_002075
02_002077
02_002694
02_002900
02_003055
02_003070
02_003314
02_003369
02_003414
02_003418
02_003420
02_003449
02_003466
02_003486
02_003492
02_003658
02_003659
02_003693
02_003810
02_003930
02_003932
02_003933
02_003941
02_004011
02_004012
02_004061
02_004401
02_004752
02_004770
02_004812
02_005574
02_005873
02_006251
02_006259
02_007090
02_007091
02_007093
02_007282
02_007500
02_007595
02_008001
02_008152
02_008457
02_008462
02_008470
02_008471
02_008472
02_008662
02_008678
02_008682
02_008686
02_008688
02_008698
02_009001
02_009005
02_009039
02_009053
02_009897
02_009898
02_009899
02_009900
02_010017
02_010140
02_010142
02_010143
02_010149
02_010724
02_010977
02_010996
02_011154
02_011155
02_011487
02_011578
02_011579
02_011775
02_011919
02_011990
02_012274
02_012279
02_012365
02_012600
02_012732
02_012769
02_013307
02_013308
02_013311
02_013312
02_014144
02_014217
02_014411
02_014571
02_014657
02_014665
02_014912
02_015292
02_015444
02_015640
02_015853
02_015902
02_016005
02_016025
02_016178
02_016189
02_016215
02_016216
02_016218
02_016418
02_016457
02_016467
02_016468
02_016520
02_016733
02_016809
02_016811
02_017493
02_017609
02_017935
02_017939
02_017940
02_018118
02_018221
02_018291
02_018294
02_018295
02_018298
02_019257
02_019633
02_019957
02_020466
02_020469
02_020571
02_020572
02_020692
02_020796
02_020804
02_020811
02_021217
02_021403
02_021682
02_021852
02_021853
02_022144
02_022307
02_022308
02_022339
02_022348
02_022705
02_022716
02_022890
02_023537
02_023653
02_10202/1294
04_000534
05_000120
05_000142
05_001260
05_001478
05_001482
05_001514
05_001536
05_001560
05_001572
05_001585
05_001586
05_001593
05_001600
05_001607
05_001614
05_001617
05_001628
05_001630
05_001675
05_001683
05_001689
05_001694
05_001697
05_002003
05_002023
05_002025
05_002027
05_002028
05_002030
05_002033
05_002038
05_002042
05_002053
05_002054
05_002059
05_002060
05_002061
05_002064
05_002068
05_002069
05_002072
05_002080
05_002083
05_002084
05_002085
05_002100
05_002106
05_003009
05_003010
05_003026
05_003028
05_003038
05_003044
05_003052
05_003053
05_003054
05_003059
05_003060
05_003061
05_003069
05_003072
05_003080
05_003087
05_003088
05_003089
05_003090
05_003093
05_004005
05_004007
05_004009
05_004010
05_004011
05_004015
05_004018
05_004020
05_004033
05_004034
05_004046
05_004047
05_004048
05_004066
05_004069
05_004073
05_004081
05_004084
05_004089
05_004096
05_004101
05_004102
05_004103
05_004118
05_004119
05_005001
05_005002
05_005006
05_005010
05_005011
05_005013
05_005021
05_005022
05_005025
05_005039
05_005045
05_005053
05_005057
05_005062
05_005077
05_005078
05_005103
07_000069
07_000081
07_000100
07_000103
07_000107
07_000118
07_000119
07_000123
07_000143
07_000144
07_000145
07_000150
07_000151
07_000159
07_000160
07_000184
07_000186
07_000187
07_000191
07_000218
07_000221
07_000224
07_000236
07_000237
07_000245
07_000248
07_000249
07_000251
07_000272
07_000283
07_000296
07_000305
07_000306
07_000307
07_000324
07_000331
07_000334
07_000335
07_000368
07_000385
07_000393
07_000394
07_000419
07_000436
07_000437
07_000443
07_000451
07_000456
07_000461
07_000498
07_000505
07_000506
07_000511
07_000515
07_000520
07_000557
07_000583
07_000615
07_000623
07_000632
07_000640
07_000641
07_000674
07_000681
07_000682
07_000699
07_000744
07_000792
07_000822
07_000824
07_000826
07_000852
07_000908
07_000911
07_000932
07_000933
07_000972
07_001004
07_001011
07_001016
07_001025
07_001028
07_001123
07_001124
07_001130
07_001145
07_001146
07_001165
07_001173
07_001206
07_001209
07_001219
07_001227
07_001274
07_002073
07_002096
07_002184
07_002211
07_002253
07_002257
07_002261
07_002272
07_002287
07_002296
07_002308
07_002378
07_002392
07_002404
07_002435
07_002455
07_002458
07_002475
07_002477
07_002481
07_002510
07_002526
07_002532
07_002554
07_002555
07_002584
07_002587
07_002588
07_002599
07_002608
07_002617
07_002663
07_002672
07_002673
07_002678
07_002679
07_002687
07_002689
07_002693
07_002694
07_002698
07_002724
07_002738
07_002747
07_002812
07_002813
07_002830
07_002844
07_002854
07_002863
07_002912
07_002920
07_002925
07_002928
07_002959
07_002966
07_002972
07_002975
07_002985
07_003032
07_003100
07_003112
07_003115
07_003129
07_003134
07_003137
07_003202
07_003219
11_000572
11_000573
95_000023
95_000134
95_000182
95_000183
95_000325
95_000339
95_000341
95_000342
95_000626
95_000631
95_000632
95_000828
95_000835
95_001257
95_001278
95_001461
95_001547
95_001749
96_000016
96_000017
96_000019
96_000020
96_000021
96_000040
96_000044
96_000046
96_000048
96_000108
96_000177
96_000194
96_000234
96_000272
96_000724
96_000801
96_000933
96_001035
96_001251
96_001317
96_001408
96_001743
96_001800
96_001840
96_001946
96_001952
96_001972
96_002438
96_002461
96_002676
96_002841
96_003151
97_000002
97_000010
97_000026
97_000038
97_000145
97_000146
97_000153
97_000154
97_000193
97_000195
97_000214
97_000224
97_000272
97_000330
97_000380
97_000383
97_000384
97_000385
97_000518
97_000604
97_000802
97_001053
97_001066
97_001086
97_001119
97_001270
97_001379
97_001380
97_001393
97_001523
97_001855
97_002022
97_002170
97_002714
97_002898
97_002966
97_003021
97_003031
97_003254
97_003255
97_003257
97_003357
98_000018
98_000030
98_000031
98_000032
98_000033
98_000051
98_000052
98_000058
98_000116
98_000126
98_000171
98_000262
98_000373
98_000471
98_000619
98_000653
98_000916
98_001026
98_001047
98_001296
98_001524
98_001525
98_001645
98_001803
98_001809
98_001884
98_002049
98_002050
98_002086
98_002130
98_002228
98_002245
98_002405
98_002410
98_002574
98_002577
98_002579
98_002585
98_002849
98_002867
98_003033
98_003034
98_003146
98_003153
98_003243
98_003414
98_003574
98_003590
98_004032
98_004033
98_004084
98_004345
98_004390
98_004410
98_004590
98_004601
98_004602
98_004642
98_004670
98_004671
98_004672
98_004673
99_000288
99_000295
99_000321
99_000396
99_000477
99_000492
99_000493
99_000500
Other finds
Area	Locus	Layer
L09-47	3
L09-47	3	1
L09-47	3	1
L09-47	3	1
L09-60	31	1
L09-78	90	1
L09-78	90	1
L09-78	90	1
L09-68	711	2
L09-68	711	2
L09-68	711	2
L09-78	91	3
L09-68	317	5
L09-78	107	9
L09-68	327	3
L09-58	181	4
L09-56	167	2
L09-56	167	2
L09-77	315	1
L09-85	97	3
L09-87	318	4
L09-97	82	12
L09-97	82	12
L09-76	318	8
L09-68	317	7
L09-68	708	4
L09-66	711	8
L09-66	72	1
L09-66	72	1
L09-46	19	5
L09-46	19	5
L09-87	322	6
L09-46	32	6
L09-59	29	5
L09-59	29	11
L09-59	29	11
L09-59	29	11
L09-59	29	11
L09-69	163	9
L09-69	163	9
L09-56	156	1
L09-56	156	1
L09-55	45	1
L09-59	29	5
L09-59	10	1
L09-59	10	1
L09-56	155	2
L09-56	155	2
L09-68	108	1
K09-87	1	4
K09-87	1	4
K09-87	9	4
L09-56	156	1
L09-56	156	1
L09-69	3	4
L09-69	3	4
L09-69	20	5
L09-69	160	1
L09-69	160	1
L09-69	111	1
L09-58	205	1
L09-69	160	1
L09-55	48	1
L09-69	160	1
L09-59	29	4
L09-59	66	1
L09-59	66	1
L09-69	163	2
K09-87	10	1
L09-59	196	1
L09-59	196	1
L09-59	19	3
L09-59	19	3
L09-69	19	4
L09-69	19	4
L09-69	19	4
L09-59	37	8
L09-59	195	1
L09-59	195	1
L09-69	65	10
L09-69	65	10
L09-68	791	1
L09-69	3	4
L09-69	3	4
L09-84	0
K09-87	102	1
L09-59	48	3
K09-87	9	4
L09-56	157	10
L09-69	91	1
L09-37	6	1
L09-69	20	6
L09-87	144	3
L09-68	106	1
L09-27	19	2
K09-87	9	4
L09-56	167	4
L09-56	167	10
L09-59	52	5
L09-59	52	5
L09-59	52	1
L09-59	52	1
L09-97	83	1
L09-07	37	1
L09-58	151	1
L09-58	151	1
K09-97	13	2
L09-17	12	5
L09-07	5	3
L09-07	5	3
K09-97	3	6
L09-07	9	1
L09-56	172	1
L09-87	29	1
K09-87	30	4
L09-37	18	1
L09-37	9	1
L09-07	5	5
L09-87	9	3
L09-17	24	1
L09-37	18	1
L09-68	711	8
L09-46	1	1
L09-46	1	1
L09-66	121	2
L09-59	69	10
L09-59	69	10
L09-59	66	11
L09-59	66	11
L09-66	121	5
L09-66	121	5
L09-66	124	1
L08-59	37	5
K09-87	1	2
K09-87	1	2
K09-87	1	2
L09-17	1	3
L09-78	107	8
L09-37	29	1
L09-68	320	9
L09-68	320	9
L09-68	8	4
L09-68	301	2
L09-68	301	2
L09-17	1	3
L09-17	1	3
L09-69	108	3
L09-69	27	3
L09-07	53	1
L09-07	53	1
K09-07	3	1
K09-97	13	2
L09-68	794	1
L09-59	77
L09-59	77
L09-65	92
L09-68	327	1
L09-68	327	1
L09-68	327	1
L09-58	180	1
L09-58	180	1
L09-58	180	1
L09-58	180	1
L09-58	180	1
L09-58	180	1
L09-47	3	no data
L09-37	1	7
L09-47	1	3
L09-07	1	2
K09-97	3	5
L09-56	118	5
L09-58	27	1
L09-58	27	1
K09-87	9	4
L09-68	301	7
L09-46	1	1
L09-86	138	4
L09-58	181	7
L09-58	181	7
L09-58	181	7
L09-58	181	7
L09-97	82	21
L09-97	82	21
L09-65	108
L09-65	108
L09-65	108
L09-68	325	6
L09-68	325	6
L09-66	325	4
L09-59	66	6
L09-59	66	6
L09-69	93	1
L09-59	66	8
L09-59	66	8
L09-67	84	7
L09-59	65	9
L09-59	65	8
L09-67	85	2
L09-17	31	1
L09-27	31	1
L09-58	34	1
L09-58	34	1
L09-69	25	4
L09-69	24	7
K09-87	9	5
L09-69	24	2
L09-75
L09-95	30	1
L09-85
L09-69	123	1
L09-69	123	1
L09-69	123	1
L09-69	123	1
L09-97	70	12
L09-97	70	12
L09-66	124	2
L09-97	70	11
L09-97	70	11
L09-97	70	11
L09-97	70	11
L09-97	70	3
L09-97	70	3
L09-88	44	1
L09-88	44	1
L09-69	146	3
L09-69	146	3
L09-69	146	3
L09-58	93	1
L09-27	27	1
K09-87	9	5
L09-17	34	1
L09-87	143	1
L09-87	143	1
L09-69	54	1
L09-69	54	1
L09-69	66	3
L09-69	66	3
L09-58	169	4
L09-58	169	4
L09-78	116
L09-78	116
L09-74	20	1
L09-74	20	1
L09-58	181	1
L09-58	181	1
L09-70	28	1
L09-70	28	1
L09-68	325	4
L09-68	325	4
L09-68	327	3
L09-68	320	7
L09-68	320	7
L09-68	327	6
L09-68	327	6
L09-68	713	5
L09-68	713	5
L09-97	55	4
L09-97	55	4
L09-78	116	6
L09-59	65	3
L09-59	65	3
L09-66	132	2
L09-94	18	3
L09-94	18	3
L09-94	18	3
L09-94	18	3
L09-69	19	1
L09-69	21	3
L09-69	21	3
L09-58	24	1
L09-58	24	1
L09-87	117	2
L09-58	19	1
L09-58	19	1
L09-58	19	1
L09-58	19	1
L09-58	19	1
L09-58	19	1
L09-58	19	1
L09-46	32	1
L09-68	368	5
L09-78	113	1
L09-68	713	2
L09-89	90	5
L09-78	1	2
L09-85	66	1
L09-07	7	3
L09-46	17	1
L09-75	60	2
L09-69	19	2
L09-58	110	5
L09-58	110	5
L09-58	110	5
L09-58	110	5
L09-60	19	1
L09-60	19	1
L09-68	774	3
L09-69	54	3
L09-69	54	3
L09-69	54	3
L09-87	320	1
L09-68	781	6
L09-68	781	5
L09-68	781	5
L09-68	317	6
L09-78	116	7
L09-78	116	7
L09-97	58	5
L09-97	58	5
L09-59	198	4
L09-67	97	1
L09-58	207	1
L09-58	207	1
L09-68	108	6
L09-58	207	1
L09-58	207	1
L10-61	41	1
No permits are requiered for experimental archaeological work based on the production of replicas and their study under German law.
Experimental replicas are stored at Museum Village Düppel, Berlin, Germany. They can be studied after written request to Laura Dietrich laura.dietrich@dainst.de
Handstone 1 (L1)
Handstone 2 (L2)
Handstone 3 (L3)
Handstone 4 (L4)
Handstone 5 (L5)
Handstone 6 (L6)
Handstone 7 (L7)
Handstone 8 (L8)
Handstone 9 (L9)
Handstone 10 (L10)
Handstone 11 (L11)
Handstone 12 (L12)
Grinding stone 1 (U1)
Grinding stone 2 (U2)
Grinding stone 3 (U3)
Grinding stone 4 (U4)
Grinding stone 5 (U5)
Grinding stone 6 (U6)
All necessary permits were obtained for the described study, which complied with all relevant regulations. Export protocol numbers 12196967-605.99(160.02.02)-E.616796; B.16.0.KVM.4.63.00.01.160.01/1110; 12196967.160.01/1021
Phytolith samples (sediment samples) currently stored at the Freie Universität Berlin (Laboratory of Physical Geography), Berlin, Germany
Sample ID	Sample location
M11-263	S3; L9-69; fill
M11-264	S2; L9-69; floor
M11-266	S3; L9-69; fill
M11-267	S2; L9-69; floor
M11-269	S3; L9-69; bedrock
M11-270	S2; L9-69; floor
M11-274	S2; L9-69; floor
M11-276	S3; L9-69; fill
M13-133	Stone vessel
Phytolith samples (from selected grinding stones) currently stored at the University Würzburg (Phytolith Laboratory), Würzburg, Germany
Sample ID	Grinding stone location	Grinding stone type
FD 04	K09-87; Loc 29.1; Sys 2	Handstone (type 1); complete
FD 05	K09-87; Loc 29.1; Sys 2	Handstone (type 1); complete
FD 06	L09-17; Loc 12.5; Sys 4	Handstone (type 1); complete
FD 11	L09-17; Loc 12.5; Sys 4	Grinding slab; fragment
FD 12	L09-17; Loc 12.5; Sys 4	Grinding slab; fragment
FD 13	L09-17; Loc 12.5; Sys 4	Grinding slab; fragment
FD 17	L09-07; Loc 5.5; Sys 4	Grinding bowl; fragment
FD 18	L09-07; Loc 5.5; Sys 4	Grinding bowl; fragment
FD 19	L09-07; Loc 5.5; Sys 4	Grinding bowl; fragment
